# Supplementary material for: Impact of Peripheral Microvascular Endothelial Dysfunction on White Matter Hyperintensity
Source: PubMed Central journal article supplement — J Am Heart Assoc. 2021 Oct 8;10(20):e021066. doi: 10.1161/JAHA.121.021066 (PMC8751863; doi:10.1161/jaha.121.021066), 2021-10-08
Supplement: JAH3-10-e021066-s001.pdf [file JAH3-10-e021066-s001.pdf]

# **Supplemental Material**

Figure S1. Change of brain morphology with aging.

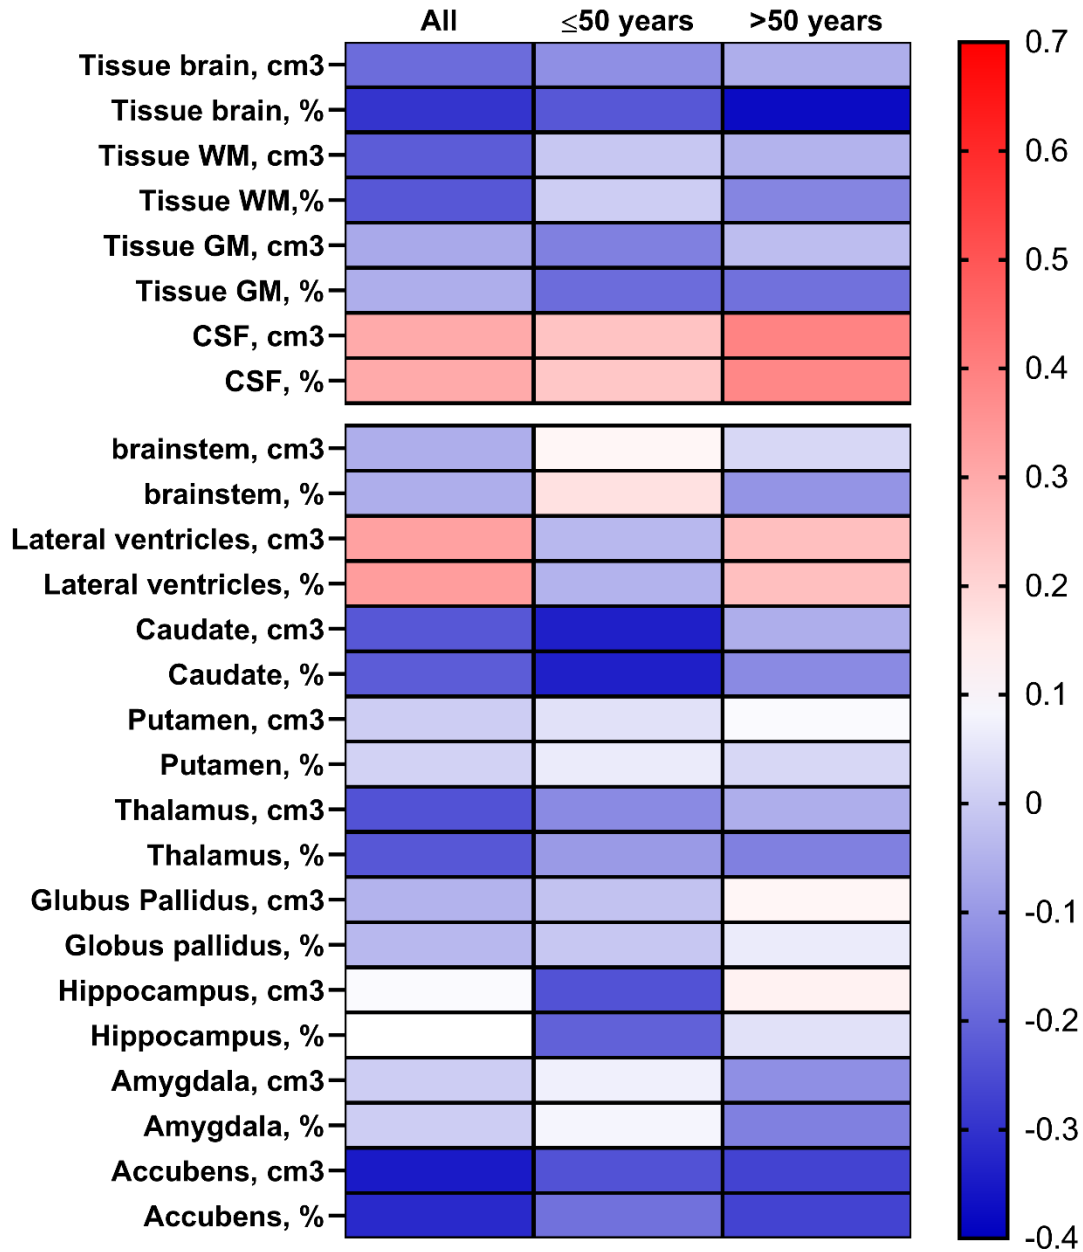

Heat map showing the Pearson's correlation ( $r$ ) between age and volume of brain structure normalized by ICV (%). CSF, cerebrospinal fluid; GM, grey matter; ICV, intracranial volume; WM, white matter.

Figure S2. Regional difference in LN WMH volume/ICV (%).

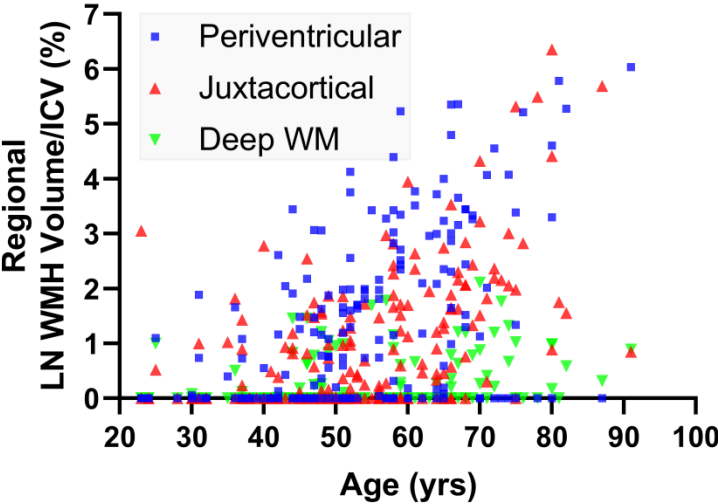

Scatter plot showing the association between age and regional WMH volume/ICV (%). ICV, intracranial volume; WMH, white matter hyperintensity.
